# Supplementary material for: Expression of ID4 protein in breast cancer cells induces reprogramming of tumour-associated macrophages
Source: Springer Nature journal article supplement (doi:10.1186/s13058-018-0990-2), 2018-06-19

**Figure S3**

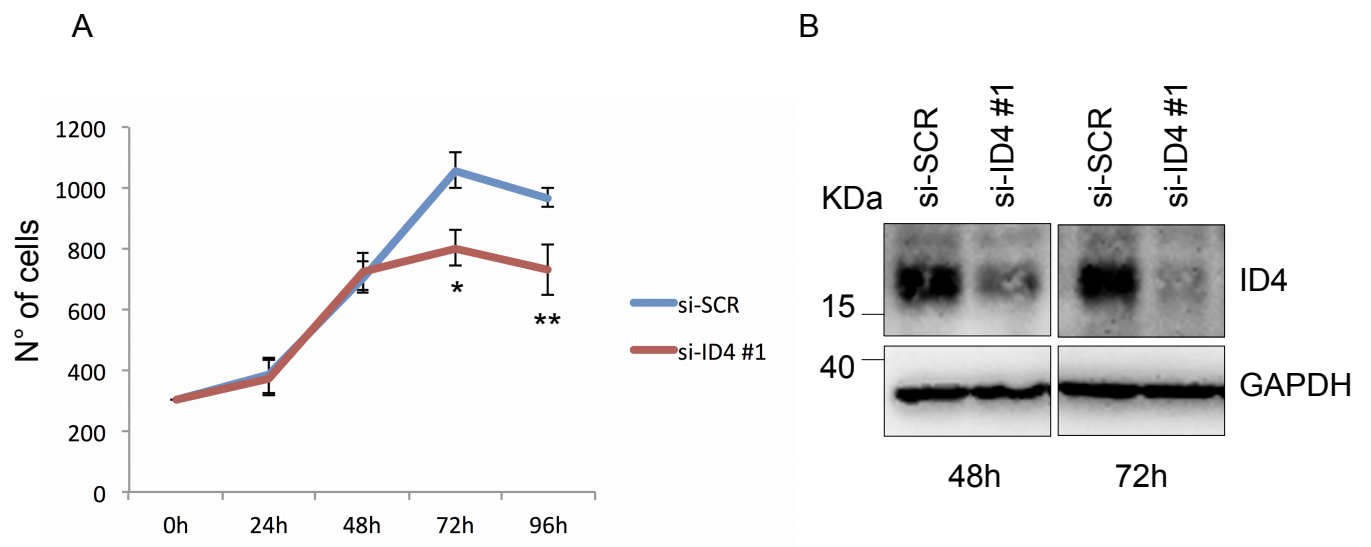

Supplement: MOESM1 [file 15857482]
